# Supplementary material
Source: PubMed Central journal article supplement (PMC4977365)
Supplement: NIHMS801343-supplement-ESI.pdf [file NIHMS801343-supplement-ESI.pdf]

**Title:**

Single Cell Dual Adherent-Suspension Co-Culture Micro-Environment for Studying Tumor-Stromal Interactions

**Authors and affiliations:**

Yu-Chih Chen<sup>a, c^</sup>, Zhixiong Zhang<sup>a^</sup>, Shamileh Fouladdel<sup>c</sup>, Yadwinder Deol<sup>c</sup>, Patrick N. Ingram<sup>b</sup>, Sean P. McDermott<sup>c</sup>, Ebrahim Azizi<sup>c</sup>, Max S. Wicha<sup>c</sup>, and Euisik Yoon<sup>\*a, b</sup>

<sup>a</sup>Department of Electrical Engineering and Computer Science, University of Michigan, 1301 Beal Avenue, Ann Arbor, MI 48109-2122;

<sup>b</sup>Department of Biomedical Engineering, University of Michigan, 2200 Bonisteel, Blvd. Ann Arbor, MI 48109-2099, USA

<sup>c</sup>University of Michigan Comprehensive Cancer Center, 1500 E. Medical Center Drive, Ann Arbor, MI 48109, USA

<sup>^</sup>Authors made equal contributions

\*Corresponding author

Yu-Chih Chen

1301 Beal Avenue, Ann Arbor, MI 48109-2122, USA

Tel: 734-272-7113; E-mail: yuchchen@umich.edu.

Euisik Yoon

1301 Beal Avenue, Ann Arbor, MI 48109-2122, USA

Tel: 734-615-4469; E-mail: esyoon@umich.edu.

## Supplementary Tables

Supplementary Table 1. The 96-gene panel chosen to identify the oncogenic signature of breast cancer cells.

|         |        |       |        |        |          |
|---------|--------|-------|--------|--------|----------|
| ABCB1   | CD146  | EZH2  | ITGB3  | NFKB1  | SOX2     |
| ABCG2   | CD20   | FBXW7 | JAG2   | NOTCH1 | STAP2    |
| AKT1    | CD24   | GAPDH | KRT18  | NOTCH2 | TAZ      |
| AKT3    | CD3D   | GATA3 | KRT19  | NOTCH3 | TGFb1    |
| ALDH1a1 | CD44   | gp130 | KRT5   | NUMB   | TGFbR1   |
| ALDH1a3 | CD45   | GSK3B | KRT7   | O ct4  | TM4SF1   |
| AMOTL2  | CDH1   | HER2  | KRT8   | p53    | TMEM57   |
| ANXA3   | CDH2   | HES1  | LIN28A | p63    | TNKS1BP1 |
| AR      | CDH3   | HEY2  | MCL1   | PCNA   | TSPAN6   |
| BAX     | CTNNB1 | HPRT1 | MET    | PGR    | Twist1   |
| BCL2    | CXCR1  | ID1   | MKI67  | PI3K   | UXT      |
| BRCA1   | CXCR4  | ID2   | MMP9   | PTEN   | Vimentin |
| CCND1   | DLL1   | IL6   | MTOR   | RAB7A  | WNT2     |
| CD11B   | EGFR   | IL6R  | MUC1   | SLUG   | YAP1     |
| CD133   | EpCAM  | IL8   | NANOG  | SNAI1  | ZEB1     |
| CD14    | ESR1   | ITGA6 | NESTIN | SOCS3  | ZEB2     |

Supplementary Table 2. The significantly different genes between mono-cultured T47D and co-cultured T47D cells.

| GeneID   | P-Value  | T47D_Mono.Average | T47D_Co.Average |
|----------|----------|-------------------|-----------------|
| KRT8     | 1.12E-11 | 6.499923          | 3.933005        |
| GATA3    | 1.35E-11 | 10.1518           | 8.411626        |
| STAP2    | 3.79E-11 | 1.686678          | 0.22912         |
| ANXA3    | 1.26E-10 | 0                 | 4.82124         |
| PI3K     | 5.45E-10 | 2.287886          | 0.786667        |
| RAB7A    | 6.68E-10 | 6.720044          | 5.250553        |
| NUMB     | 1.66E-09 | 3.416033          | 1.718079        |
| TNKS1BP1 | 1.60E-08 | 3.94843           | 2.214316        |
| KRT18    | 2.85E-08 | 8.774339          | 7.566195        |
| HES1     | 6.28E-08 | 3.101816          | 1.386066        |
| HER2     | 8.57E-07 | 3.783676          | 2.242492        |
| MUC1     | 9.26E-07 | 6.016341          | 4.896981        |
| NOTCH3   | 1.60E-06 | 1.86625           | 0.754887        |
| CDH1     | 1.51E-05 | 7.267235          | 6.347858        |
| UXT      | 1.78E-05 | 3.2059            | 2.154927        |
| MTOR     | 3.19E-05 | 2.229556          | 1.159141        |
| CTNNB1   | 4.85E-05 | 5.813502          | 4.985064        |
| MKI67    | 8.85E-05 | 0.203386          | 1.79967         |
| KRT19    | 0.000147 | 5.695987          | 4.566369        |
| SOCS3    | 0.00022  | 3.07186           | 1.795577        |
| CD24     | 0.00033  | 4.988667          | 3.551879        |
| MCL1     | 0.000817 | 5.789805          | 5.027195        |
| BAX      | 0.000927 | 3.141727          | 1.894075        |
| PTEN     | 0.00323  | 2.354125          | 1.641271        |
| DLL1     | 0.004232 | 0.088481          | 0.872926        |
| PGR      | 0.00432  | 1.186971          | 2.392999        |
| JAG2     | 0.005557 | 0.594469          | 1.414207        |
| CXCR4    | 0.005948 | 1.949017          | 1.187916        |
| ITGA6    | 0.011887 | 1.534064          | 0.777038        |
| AMOTL2   | 0.015817 | 0.228205          | 0.776759        |
| TSPAN6   | 0.016113 | 0.366471          | 0.07542         |
| O ct4    | 0.023234 | 3.24693           | 3.681141        |
| HPRT1    | 0.024165 | 0.440148          | 0.943632        |
| CDH3     | 0.035109 | 0.213805          | 0.040821        |
| NOTCH2   | 0.041917 | 3.866909          | 3.33749         |

Supplementary Table 3. The significantly different genes between MKI67 high and MKI67 low cells in co-culture group.

| GeneID | P-Value  | MKI67+.Average | MKI67-.Average |
|--------|----------|----------------|----------------|
| MKI67  | 5.90E-14 | 3.904091       | 0              |
| EZH2   | 3.08E-07 | 3.110625       | 0.281208       |
| JAG2   | 6.42E-05 | 2.450704       | 0.649195       |
| CCND1  | 0.000245 | 4.777958       | 6.013382       |
| PCNA   | 0.000464 | 6.096981       | 3.268994       |
| BRCA1  | 0.00078  | 3.258604       | 0.913685       |
| ANXA3  | 0.0019   | 2.885846       | 6.501779       |
| NOTCH1 | 0.003295 | 2.031445       | 0.843698       |
| BAX    | 0.008143 | 2.658863       | 1.215017       |
| HPRT1  | 0.029467 | 1.574787       | 0.702613       |
| ID1    | 0.049499 | 4.654944       | 3.797625       |

Supplementary Figures

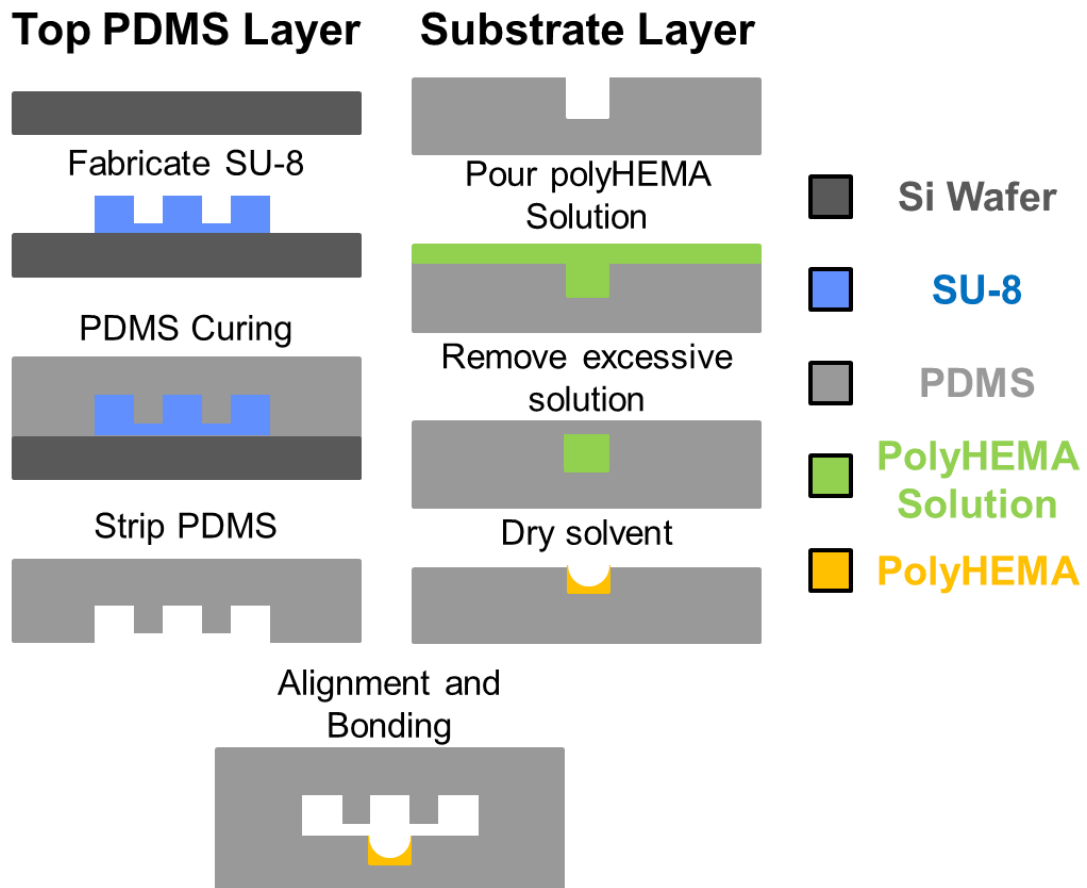

Supplemental Fig. 1. Fabrication process of the dual adherent-suspension co-culture micro-environment.

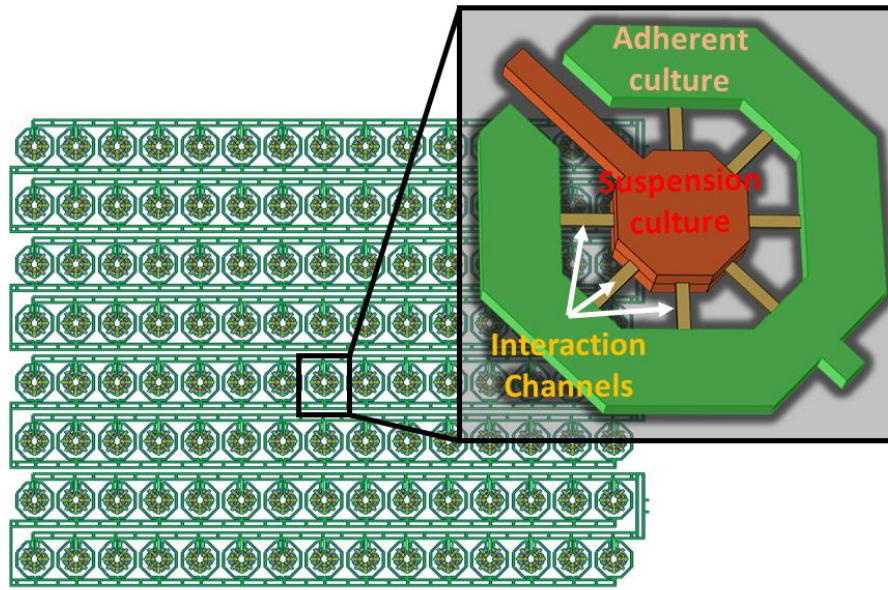

Supplementary Fig. 2: The presented dual culture platform. Cancer cells are loaded into a suspension chamber for clonal sphere formation while the stromal cells are cultured in the adherent chamber in close proximity for interaction through small connecting channels.

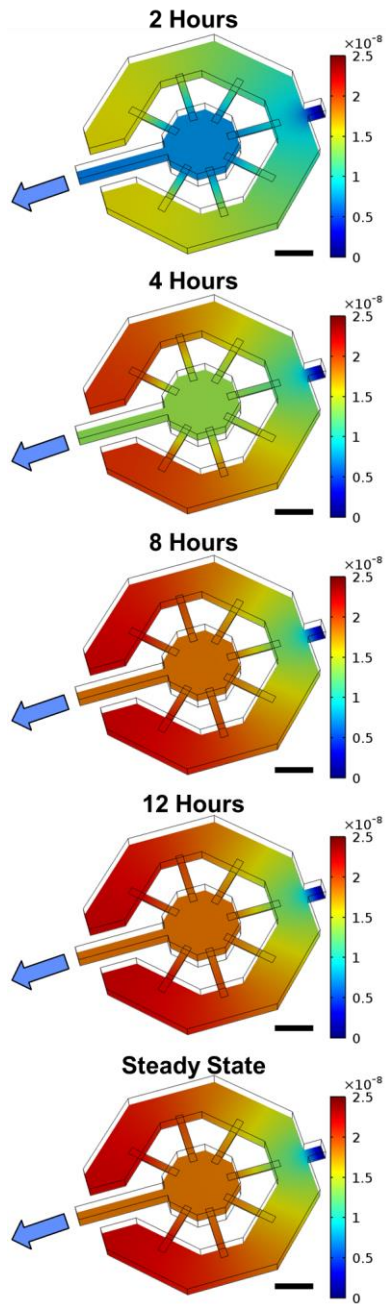

Supplemental Fig. 3. Simulations of the distribution of the concentration (mole/L) of the proteins secreted by fibroblast when 50 Pa was applied to the adherent port of the chamber (the flow condition right after media exchange) using COMSOL 5.1. We assume that one cell secretes 1000 proteins per second, 10 fibroblasts are captured in the outer chamber, and the protein diffusion coefficient is  $1^{-10} \text{ m}^2/\text{s}$ .<sup>1-4</sup> (Scale bar: 100  $\mu\text{m}$ )

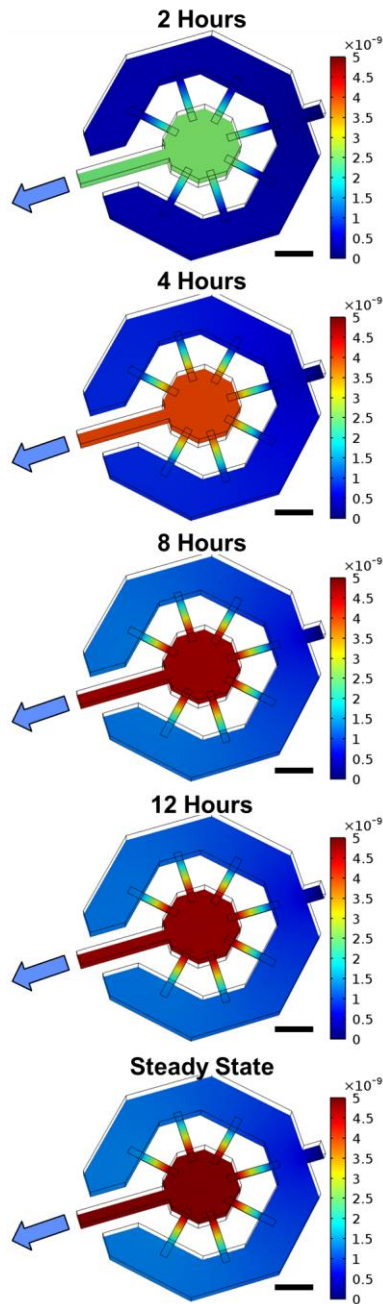

Supplemental Fig. 4. Simulations of the distribution of the concentration (mole/L) of the proteins secreted by cancer cell when 50 Pa was applied to the adherent port of the chamber (the flow condition right after media exchange) using COMSOL 5.1. We assume that one cell secretes 1000 proteins per second, 1 cancer cell is captured in the inner chamber, and the protein diffusion coefficient is  $1^{-10} \text{ m}^2/\text{s}$ .<sup>1-4</sup> (Scale bar: 100  $\mu\text{m}$ )



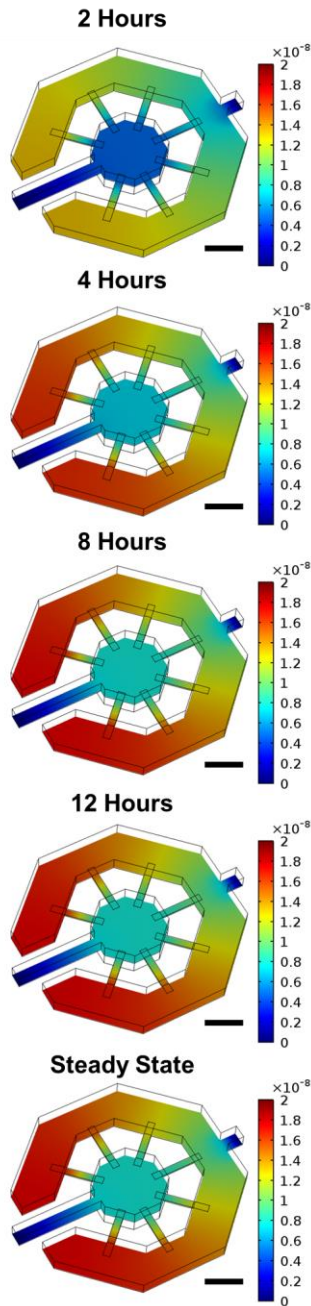

Supplemental Fig. 5. Simulations of the distribution of the concentration (mole/L) of the proteins secreted by fibroblast when there is no flow using COMSOL 5.1. We assume that one cell secretes 1000 proteins per second, 10 fibroblasts are captured in the outer chamber, and the protein diffusion coefficient is  $1^{-10} \text{ m}^2/\text{s}$ .<sup>1-4</sup> (Scale bar: 100  $\mu\text{m}$ )

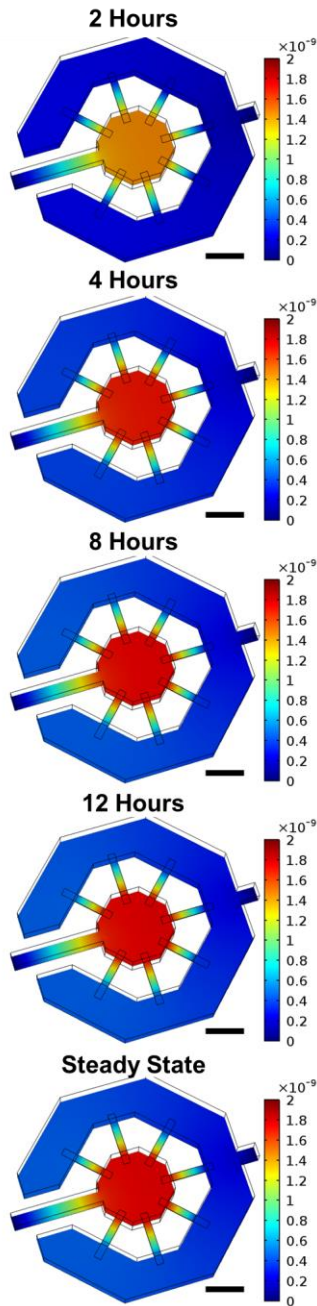

Supplemental Fig. 6. Simulations of the distribution of the concentration (mole/L) of the proteins secreted by cancer cell when there is no flow using COMSOL 5.1. We assume that one cell secretes 1000 proteins per second, 1 cancer cell is captured in the inner chamber, and the protein diffusion coefficient is  $1^{-10} \text{ m}^2/\text{s}$ .<sup>1-4</sup> (Scale bar: 100  $\mu\text{m}$ )

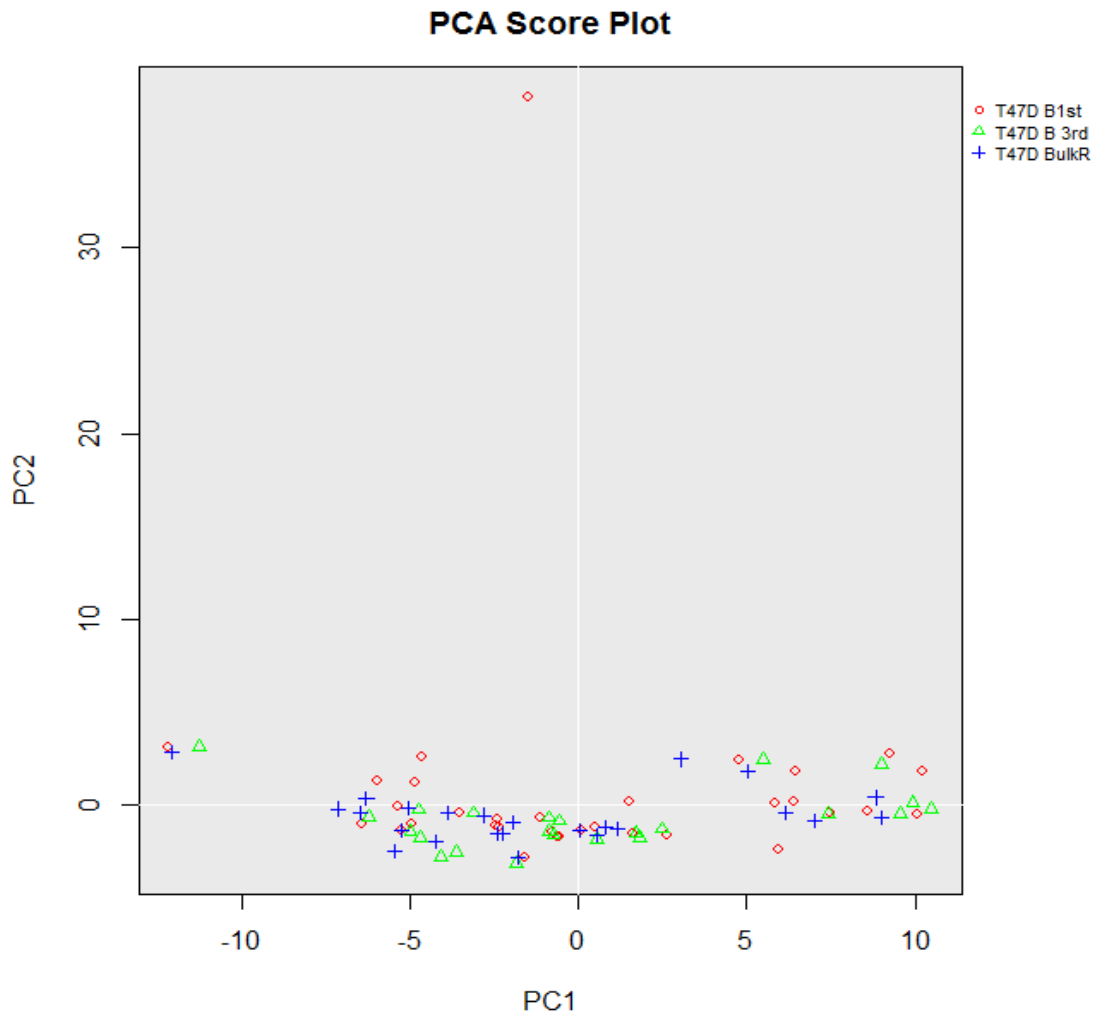

Supplemental Fig. 7. Principal component analysis (PCA) plot showing log<sub>2</sub> gene expression data of single cells from T47D breast cancer cell line. T47D B1st (Red) and T47D BulkR (Blue) are the same single cells isolated by C1 and analyzed by BioMark HD in 2 separate RT-qPCR experiments as technical replicates. T47D B3rd (Green) and T47D B1st (Red) are biological replicates of 2 independent C1/BioMark HD experiments.

### Before Etching

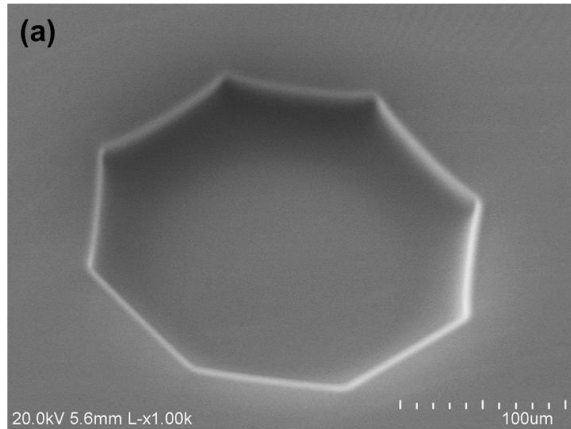

### Proper Etching

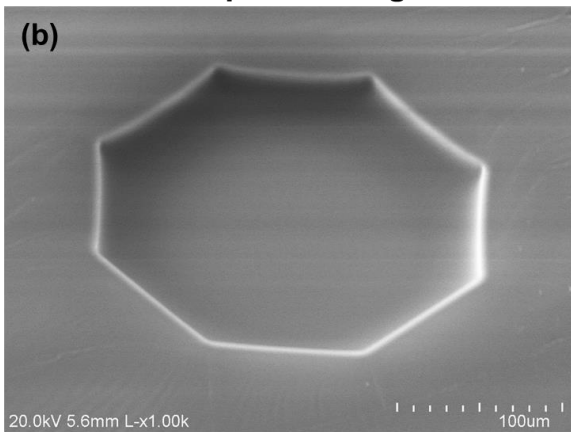

### Over-etching

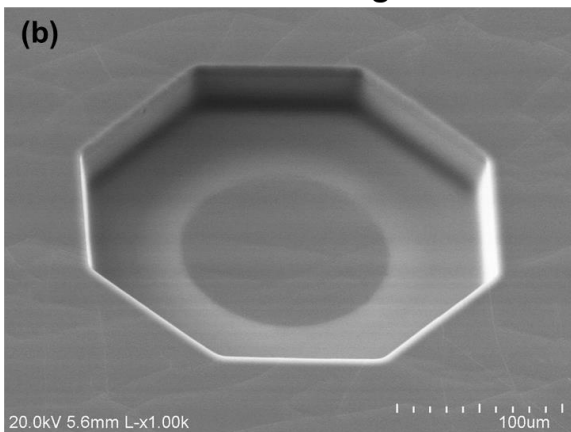

Supplemental Fig. 8. The plasma etching process to remove residual polyHEMA. (a) Before Etching, (b) Proper etching only removes the un-desired polyHEMA residues. (b) Over-etching can etch the polyHEMA in the indented well and expose the PDMS substrate.

## MDA-MB-231

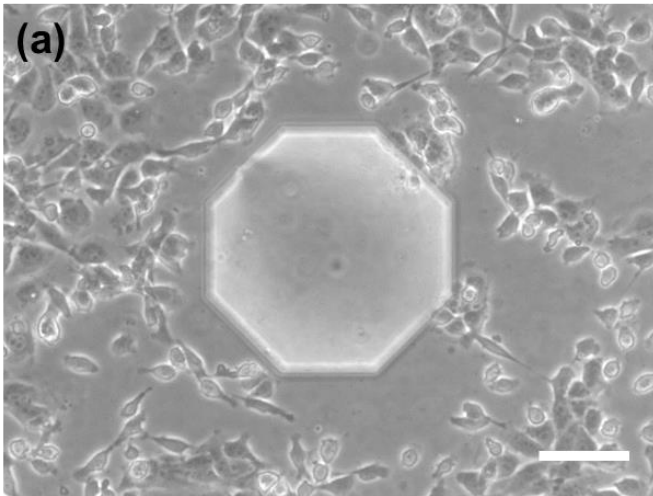

## C2C12

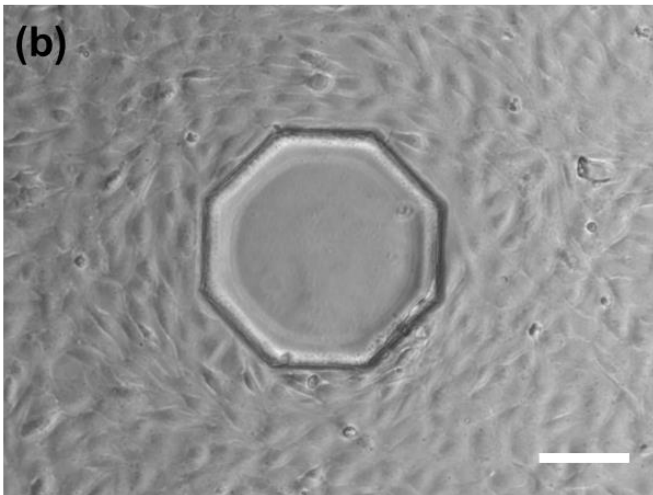

Supplemental Fig. 9. The selectivity of the adherent-suspension co-culture micro-environment of (a) MDA-MB-231 and (b) C2C12 cells. For both cell lines, no cell adhere in the polyHEMA-coated indented well, but cells can adhere on the un-coated. (scale bar: 100  $\mu\text{m}$ )

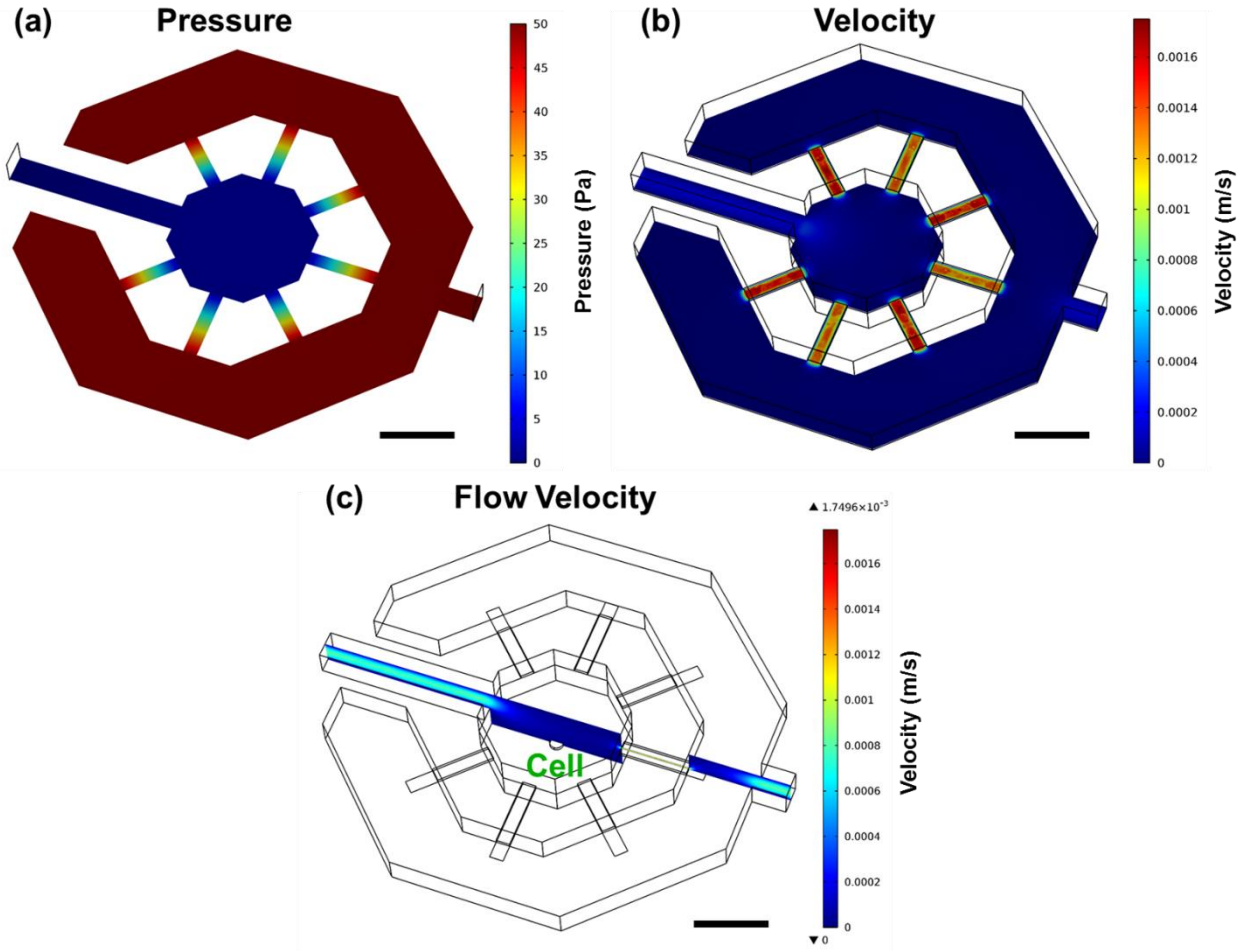

Supplemental Fig. 10. COMSOL simulations of the cell loading process: (a) pressure, (b) flow velocity in the XY-plane of  $1.5 \mu\text{m}$  height (the half of the height of the interaction channel), and (c) the flow velocity in the XZ-plane. 50 Pa was applied to the adherent port of the chamber to simulate the flow condition right after media exchange. The results suggest that once a cell settles into the indented well, it is unlikely to be washed out by reversing flow. (Scale bar:  $100 \mu\text{m}$ )

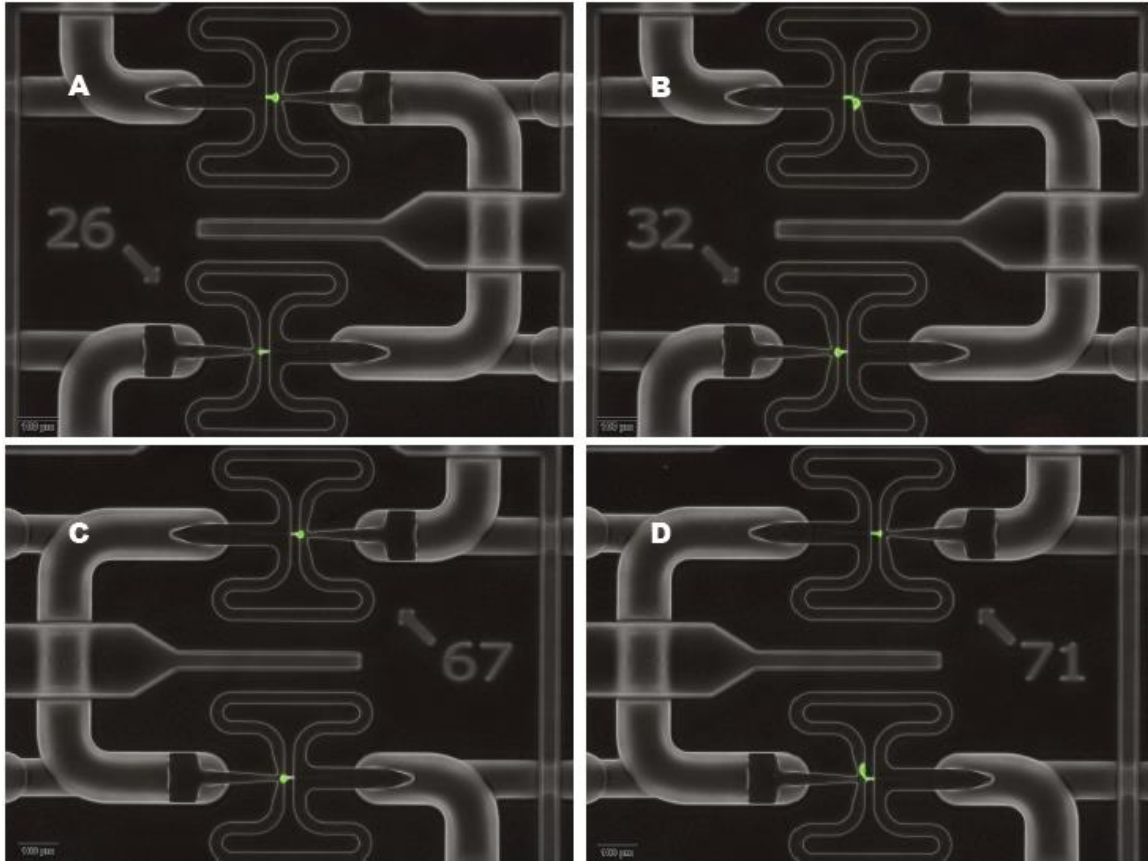

Supplemental Fig. 11. Representative images of single breast cancer cells isolated within the C1 chip. Cells of different sizes and morphology can be captured on-chip.

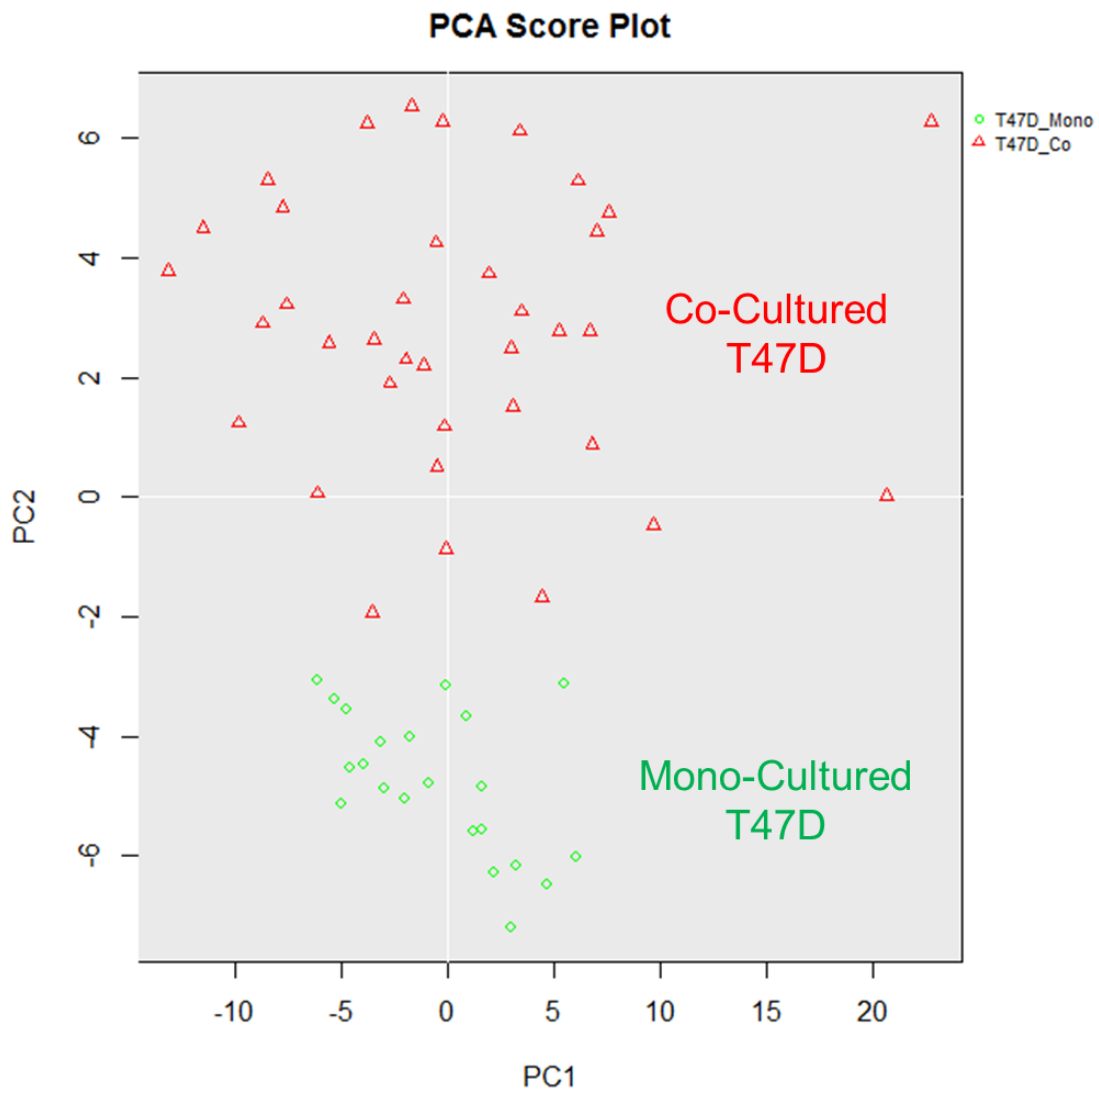

Supplementary Fig. 12. PCA clustering of single cell expression analysis for co-cultured (red, N=37) and mono-cultured (green, N=22) T47D cells compared. The results were not normalized.



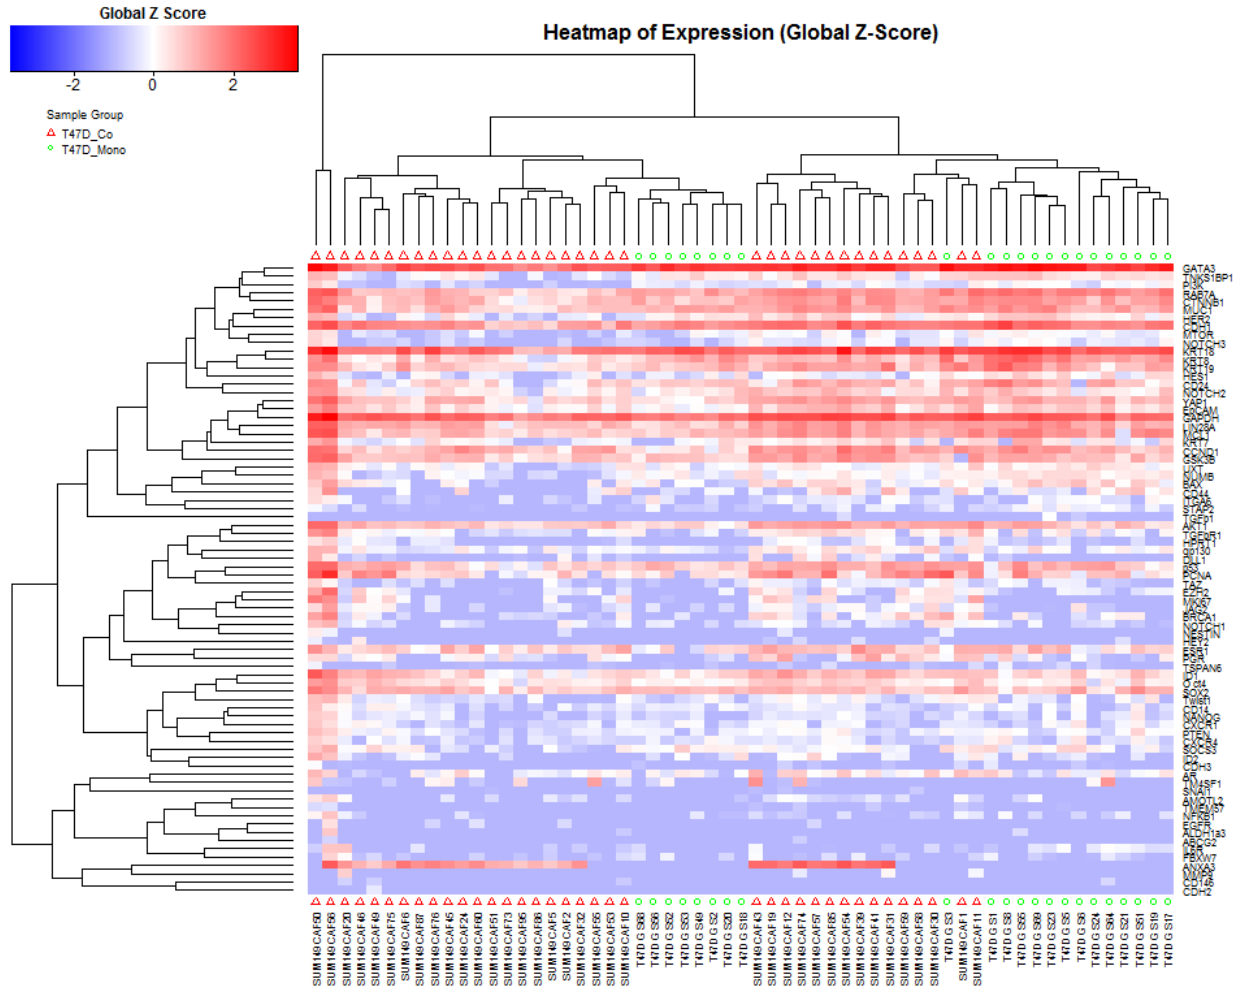

Supplementary Fig. 13. Heatmap hierarchical clustering of single cell expression analysis for between co-cultured (red, N=37) and mono-cultured (green, N=22) T47D cells. The results were not normalized.

## Violin Plot of Gene Expression By the Order of PCA Gene Scores

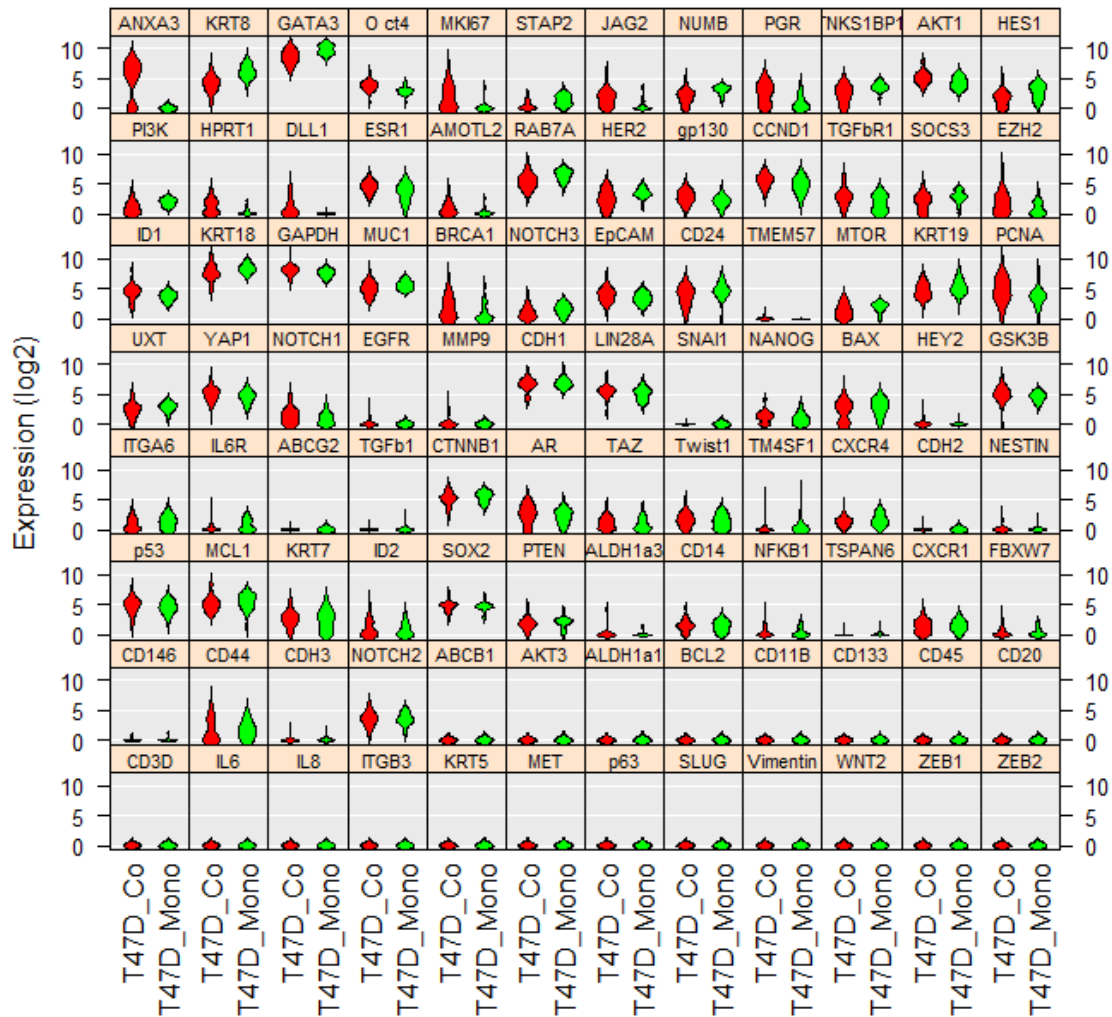

Supplementary Fig. 14. Violin plots of all 96 genes of co-cultured (red, N = 37) and mono-cultured (green, N = 22) cells. The results were not normalized.

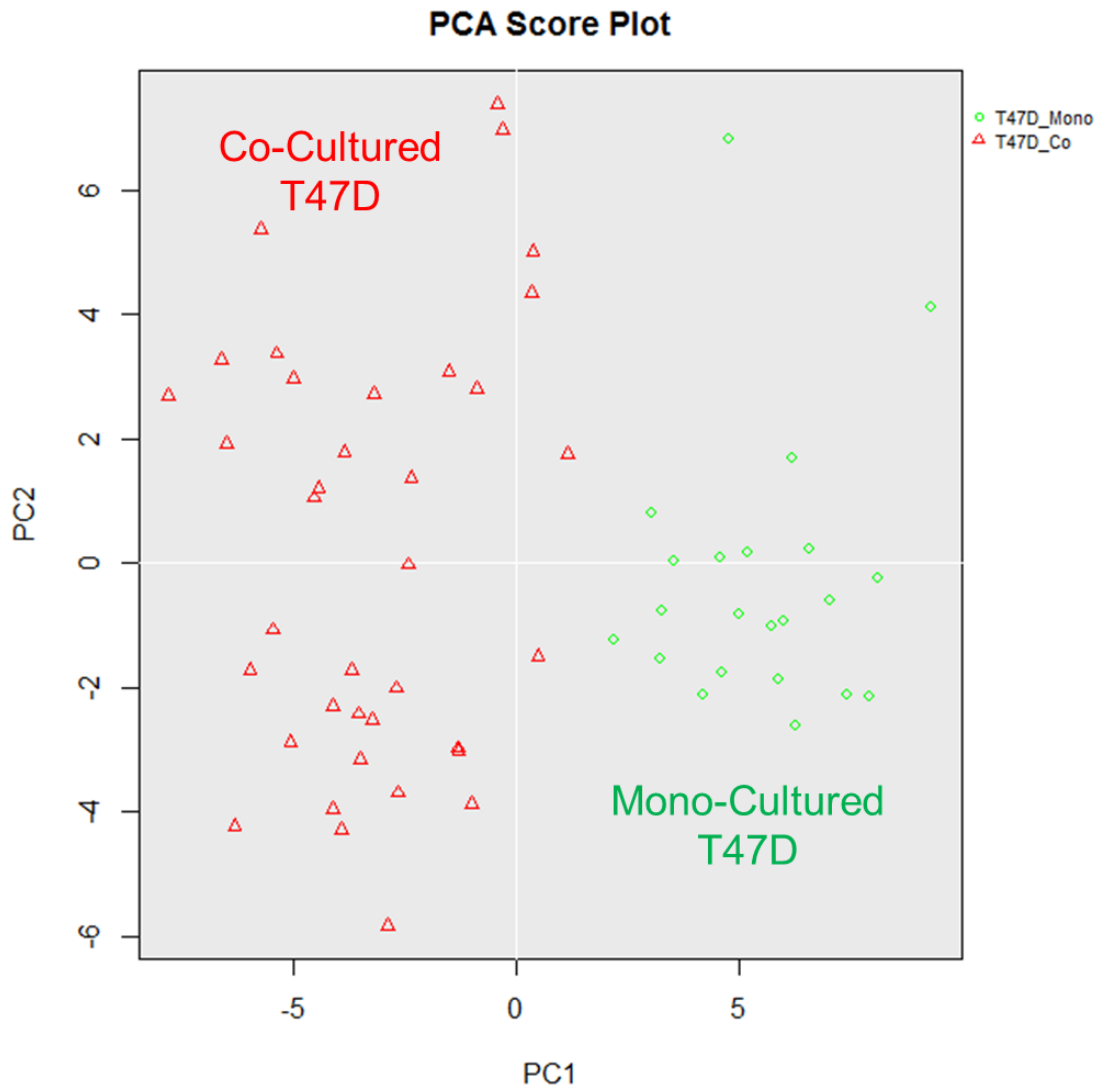

Supplementary Fig. 15: PCA clustering of single cell expression analysis for co-cultured (red, N=37) and mono-cultured (green, N=22) T47D cells compared. The results were normalized by GAPDH.

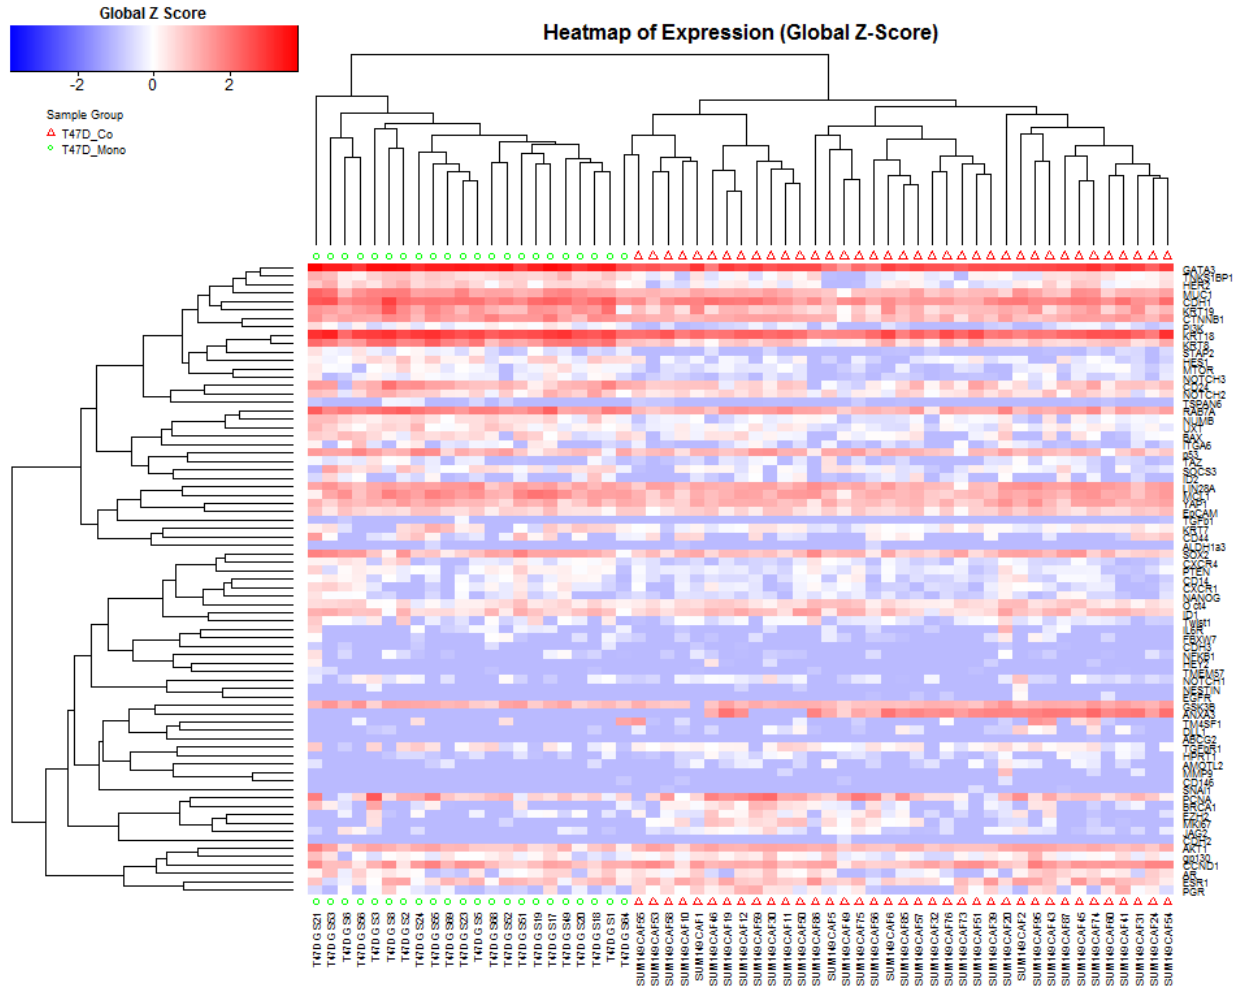

Supplementary Fig. 16. Heatmap hierarchical clustering of single cell expression analysis for between co-cultured (red, N=37) and mono-cultured (green, N=22) T47D cells. The results were normalized by GAPDH.

## Violin Plot of Gene Expression By the Order of PCA Gene Scores

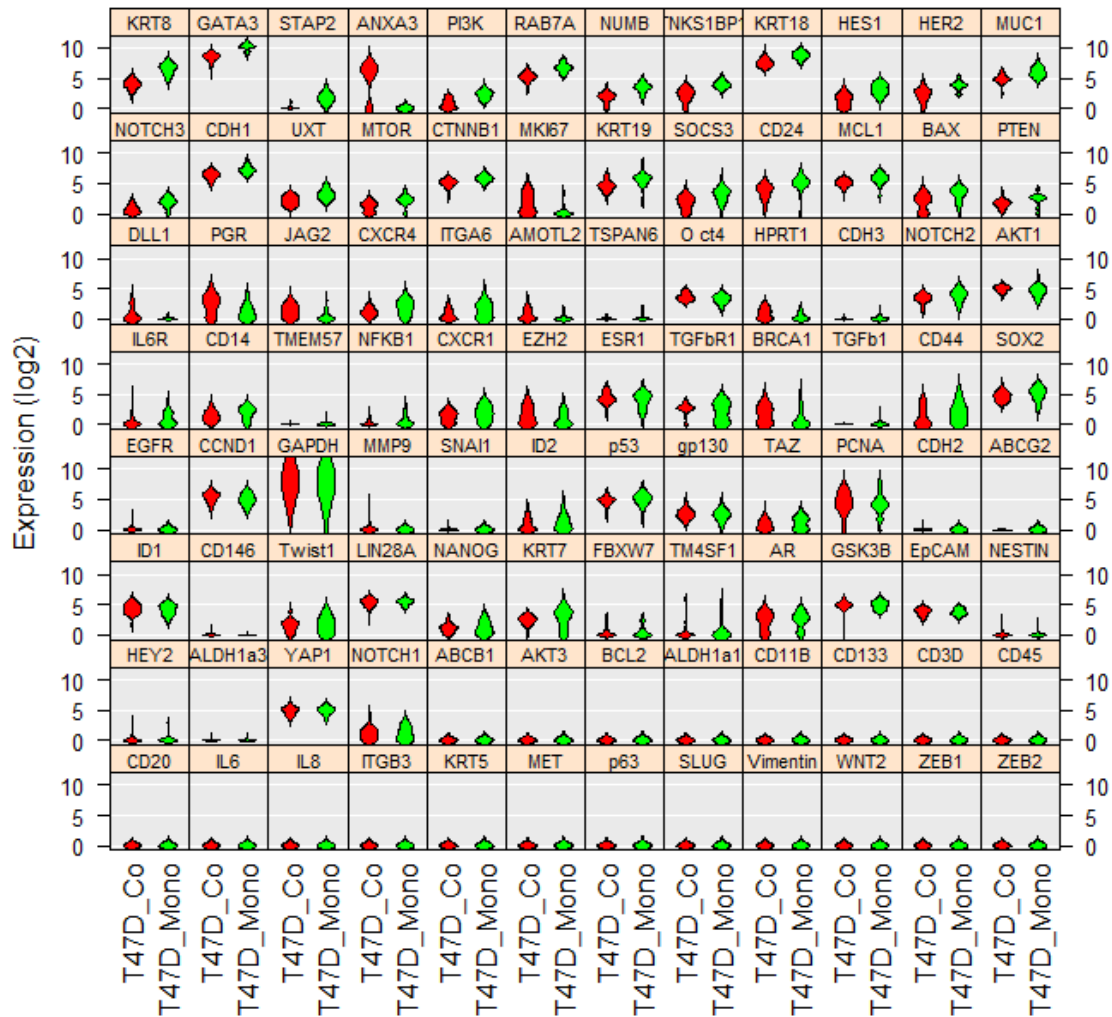

Supplementary Fig. 17. Violin plots of all 96 genes of co-cultured (red, N = 37) and mono-cultured (green, N = 22) cells. The results were normalized by GAPDH.

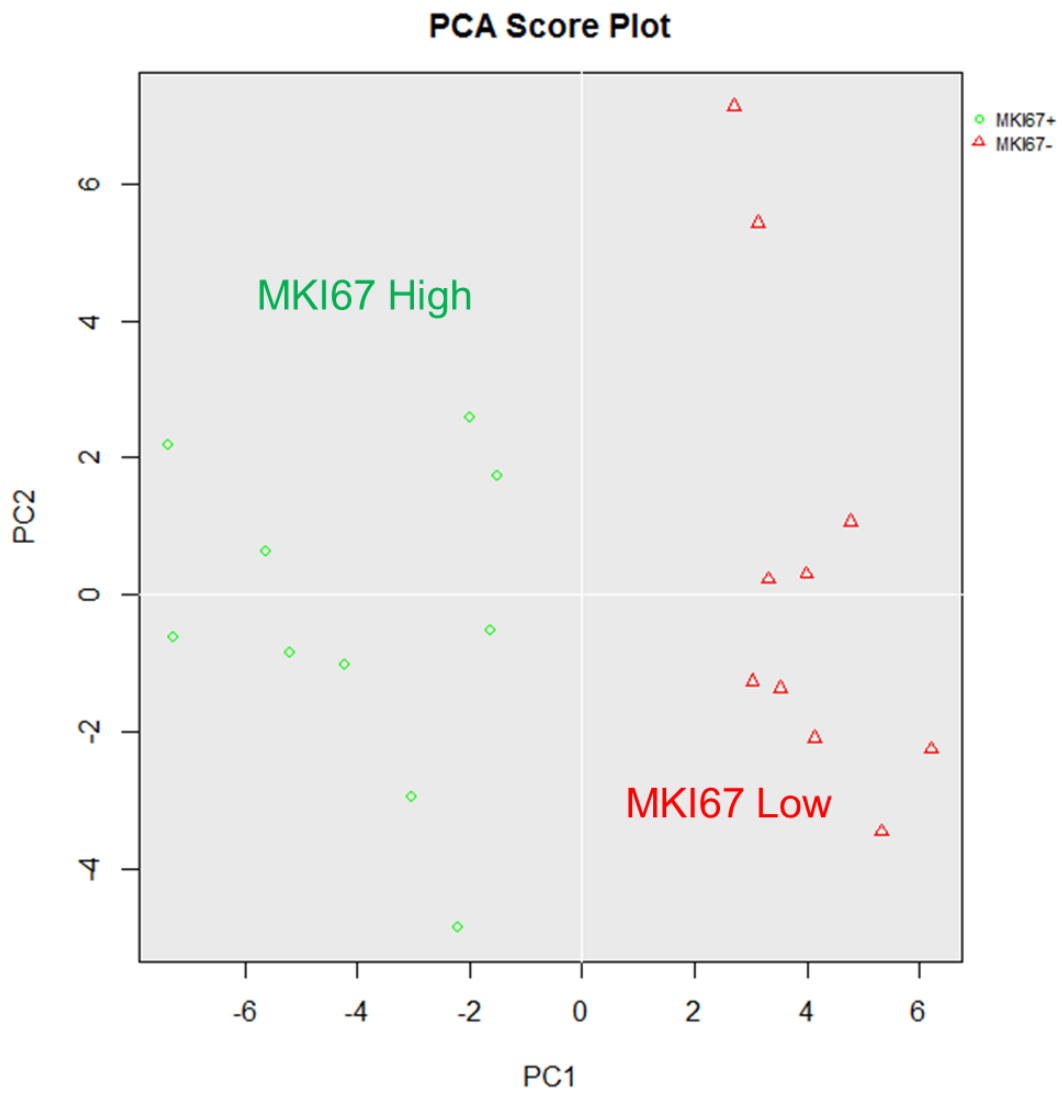

Supplementary Fig. 18: PCA clustering of single cell expression analysis for MKI67 high (green, N=10) and MKI 67 low (red, N=10) cells in the co-cultured group. The results were normalized by GAPDH.



## Violin Plot of Gene Expression By the Order of PCA Gene Scores

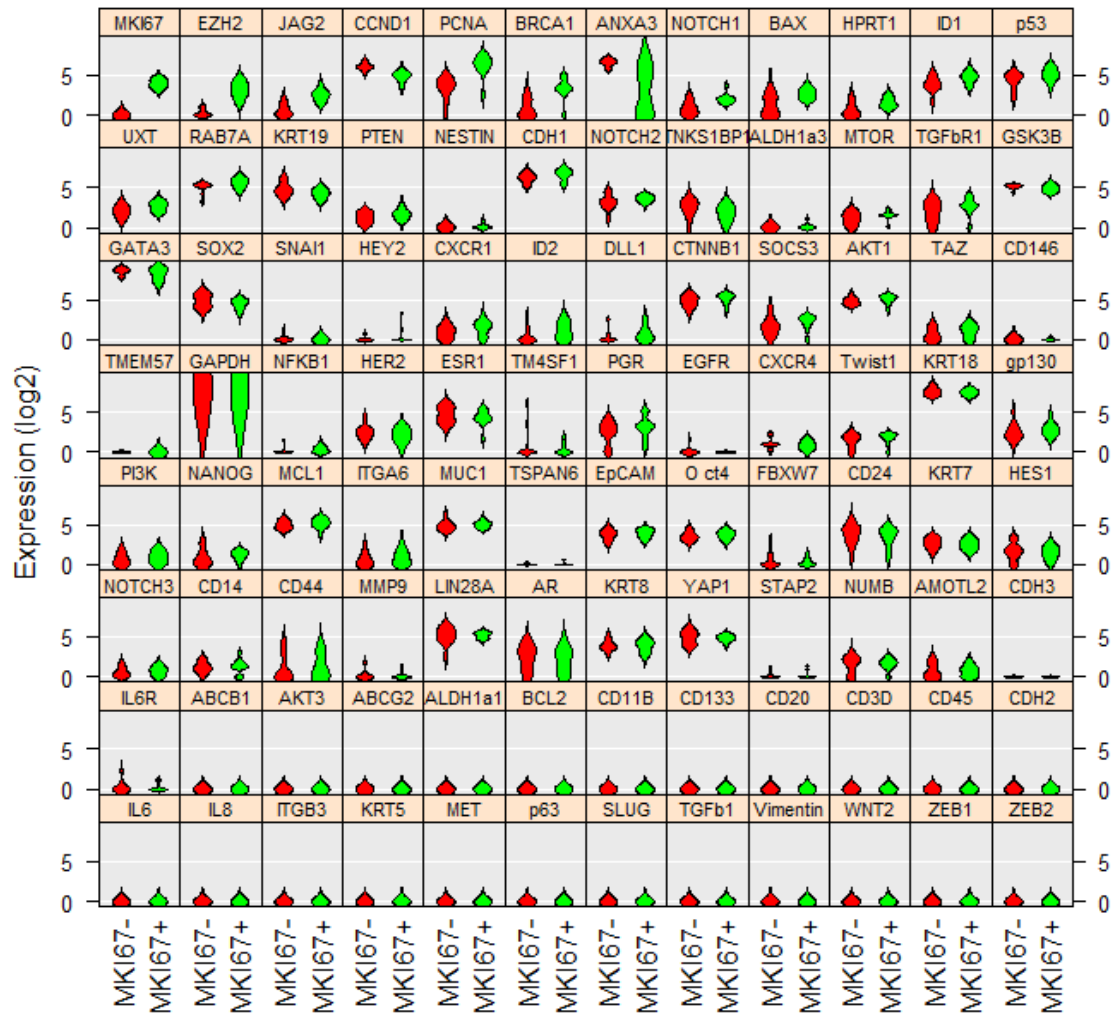

Supplementary Fig. 20. Violin plots of all 96 genes of MKI67 high (green, N=10) and MKI 67 low (red, N=10) cells in the co-cultured group. The results were normalized by GAPDH.



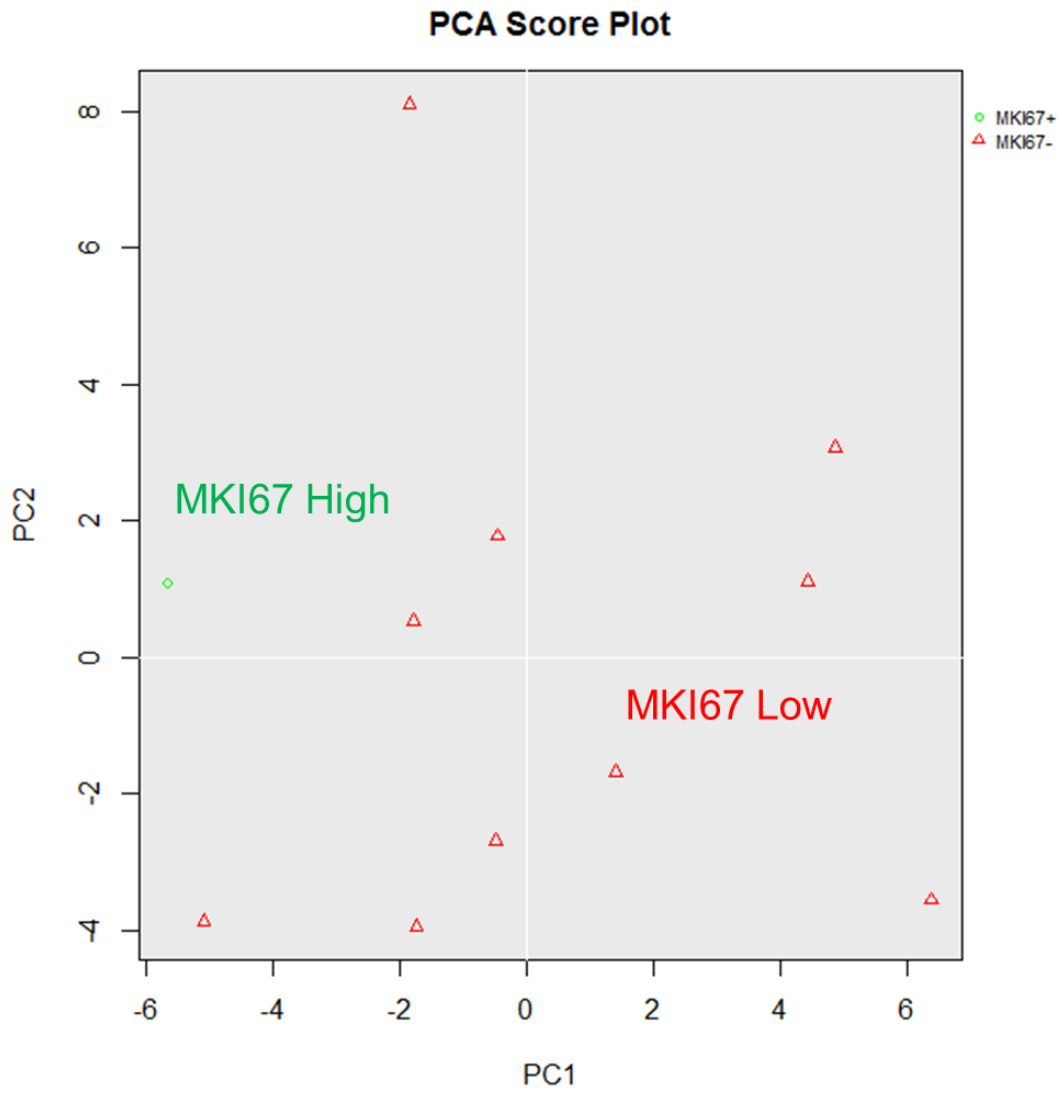

Supplementary Fig. 21: PCA clustering of single cell expression analysis for MKI67 high (green, N=1) and MKI 67 low (red, N=10) cells in the mono-cultured group. The results were normalized by GAPDH.

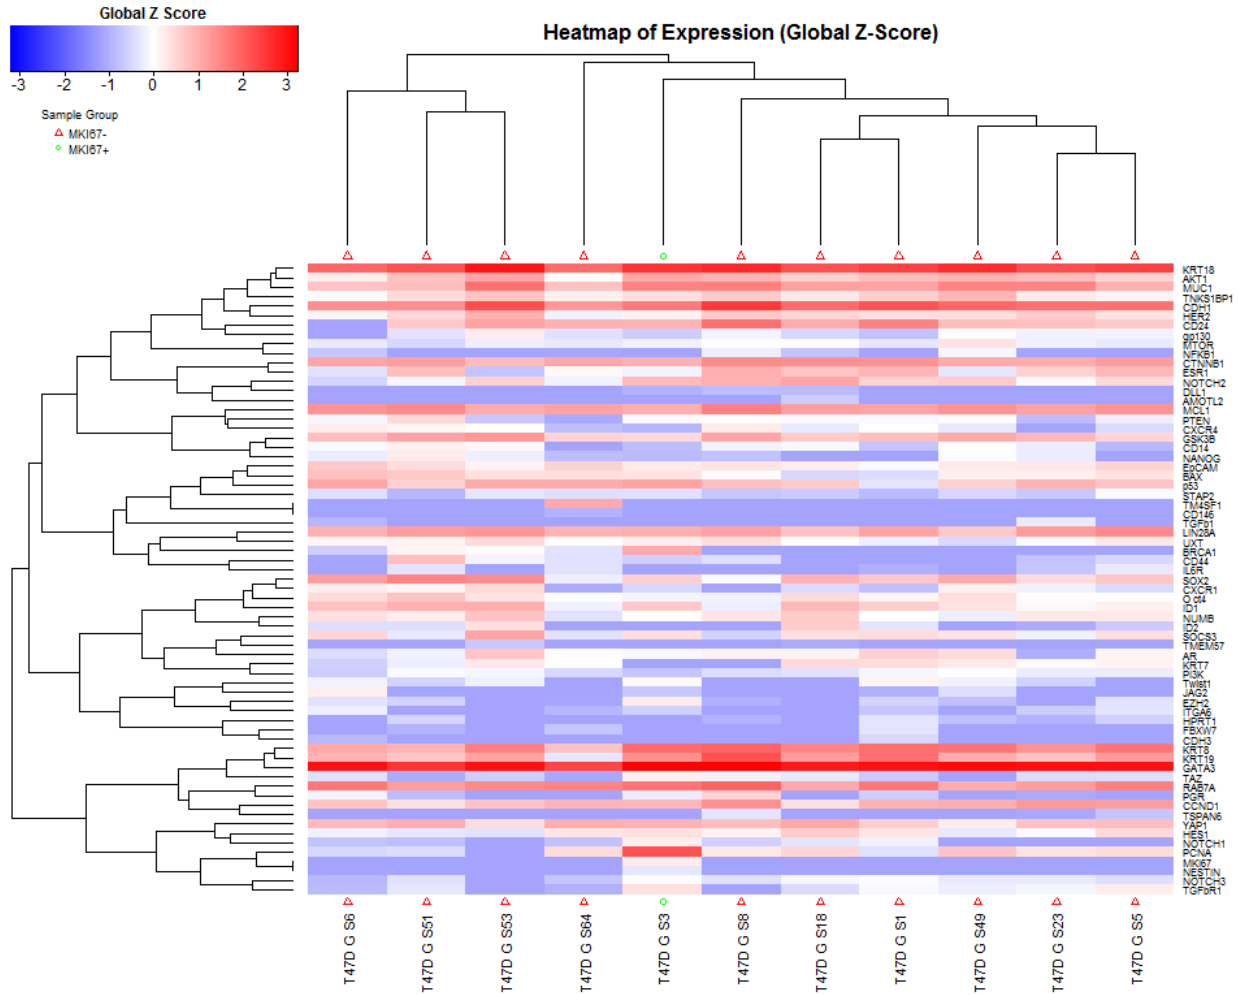

Supplementary Fig. 22. Heatmap hierarchical clustering of single cell expression analysis for MKI67 high (green, N=1) and MKI 67 low (red, N=10) cells in the mono-cultured group. The results were normalized by GAPDH.

## Violin Plot of Gene Expression By the Order of PCA Gene Scores

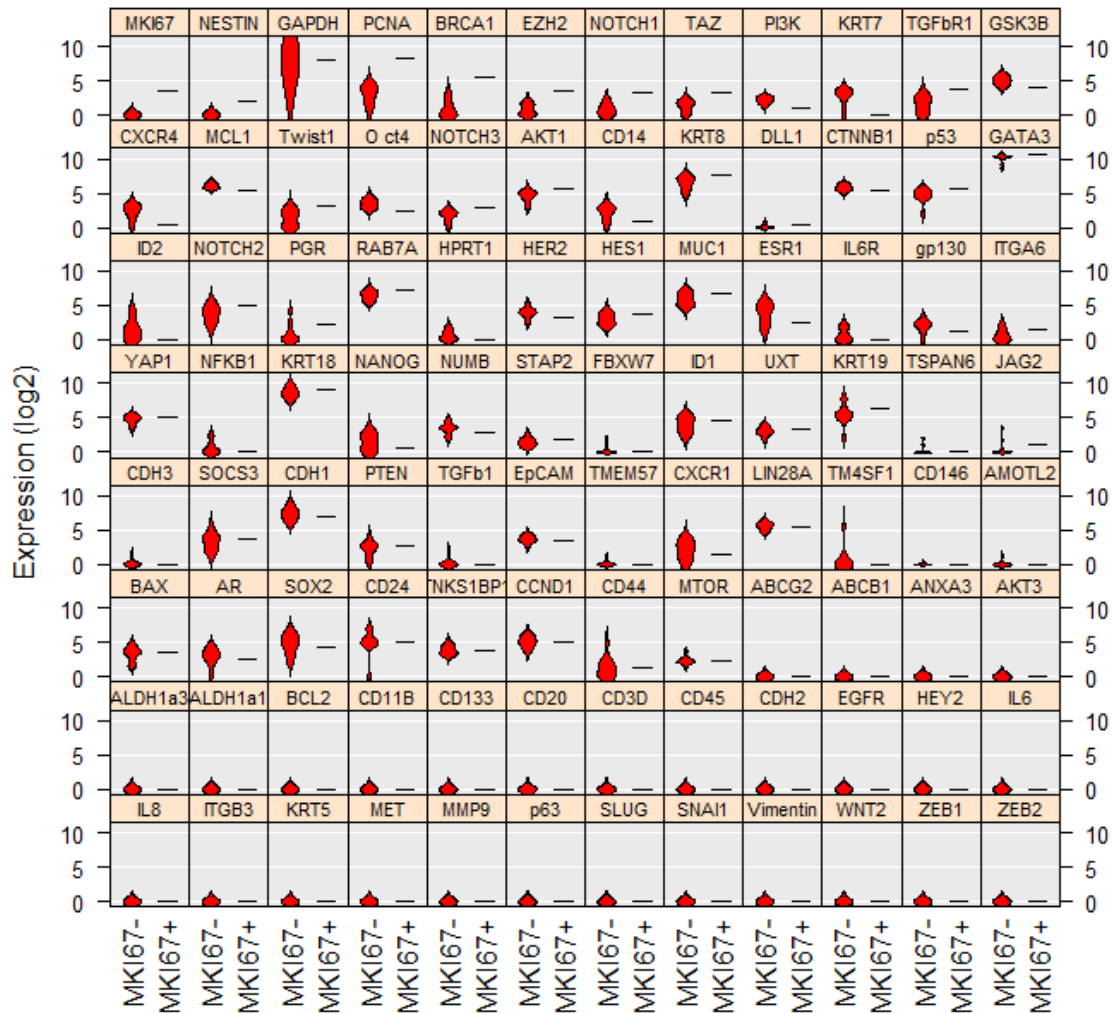

Supplementary Fig. 23. Violin plots of all 96 genes of MKI67 high (green, N=1) and MKI 67 low (red, N=10) cells in the mono-cultured group. The results were normalized by GAPDH.

**Reference:**

1. Henn A. D.; Rebhahn J.; Brown M. A.; Murphy A. J.; Coca M. N.; Hyrien O.; Pellegrin T.; Mosmann T.; Zand M. S. *J. Immunol.* 2009, **183**, 3177–3187.
2. Alexis J. Torres, Abby S. Hill, and J. Christopher Love, *Anal Chem.* 2014, **86(23)**, 11562–11569.
3. Love J. C. Ronan J. L. Grotenbreg G. M. van der Veen A. G. Ploegh H. L. *Nat. Biotechnol.* 2006, **24**, 703–707.
4. Charlet M. Kromenaker S. J. Srienc F. *Biotechnol. Bioeng.* 1995, **47**, 535–540.
